# Supplementary material
Source: publisher site journal article supplement (https://www.dovepress.com/article/387506)
Supplement: Supplementary file 1 [file get_supplementary_file.php]

**Table S1.** The Taiwan Daily Food Guide for adults.

|  | Daily energy needs (kcal/day) | | | | | |  |
| --- | --- | --- | --- | --- | --- | --- | --- |
| Index item | ≥ 1200 | ≥ 1500 | > 1800 | ≥ 2000 | ≥ 2200 | ≥ 2500 | > 2700 |
| Minimal servings from cereals and whole grains | 1.5 | 2.5 | 3 | 3 | 3.5 | 4 | 4 |
| Minimal servings from protein-rich foods | 3 | 4 | 5 | 6 | 6 | 7 | 8 |
| Minimal servings from dairy products | 1.5 | 1.5 | 1.5 | 1.5 | 1.5 | 1.5 | 2 |
| Minimal servings from vegetables | 3 | 3 | 3 | 4 | 4 | 5 | 5 |
| Minimal servings from fruits | 2 | 2 | 2 | 3 | 3.5 | 4 | 4 |
| Minimal servings from fats, oils, and nuts |  |  |  |  |  |  |  |
| Fats and oils | 3 | 3 | 4 | 5 | 5 | 6 | 7 |
| Nuts | 1 | 1 | 1 | 1 | 1 | 1 | 1 |

Table S2 Associations between the levels of adherence to individual food group and the risk of having osteoporosis.

| Variable | n=2,532 |
| --- | --- |
| Food group 1 (cereals and whole grains) |  |
| Score < 0.5 | Reference |
| 0.5 ≤ Score ≤ 1 | 0.84 (0.55-1.28) |
| Score > 1 | 1.29 (0.72-2.33) |
| Food group 2 (protein-rich foods) |  |
| Score < 0.5 | Reference |
| 0.5 ≤ Score ≤ 1 | 0.98 (0.77-1.25) |
| Score > 1 | 1.55 (1.00-2.42) |
| Food group 3 (dairy products) |  |
| Score < 0.5 | Reference |
| 0.5 ≤ Score ≤ 1 | 0.90 (0.69-1.17) |
| Score > 1 | 0.71 (0.35-1.43) |
| Food group 4 (vegetables) |  |
| Score < 0.5 | Reference |
| 0.5 ≤ Score ≤ 1 | 0.85 ( 0.61-1.19) |
| Score > 1 | 0.70 (0.50-0.99) |
| Food group 5 (fruits) |  |
| Score < 0.5 | Reference |
| 0.5 ≤ Score ≤ 1 | 1.12 (0.70-1.79) |
| Score > 1 | 0.84 (0.57-1.23) |
| Food group 6 (nuts) |  |
| Score < 0.5 | Reference |
| 0.5 ≤ Score ≤ 1 | 0.85 (0.51-1.42) |
| Score > 1 | 0.86 (0.62-1.20) |

Score = 1 means that the participants consumed exactly recommended servings of the food group; Score = 0.5 means that the participants consumed half of recommended servings of the food group.
